# Supplementary material for: Application of Self-Organizing Maps to characterize subglacial bedrock properties in East Antarctica based on gravity, magnetic and radar data
Source: Copernicus journal article supplement (doi:10.5194/egusphere-2025-1905), 2025-05-12
Supplement: Supplementary file [file egusphere-2025-1905-RC2-supplement.pdf]

## **Detailed comments on the MS by Liebsch et al.**

**TITLE-** I find the current title a bit misleading and would therefore recommend changing it (see below)

Application of Self-Organizing Maps to characterize subglacial bedrock properties in East Antarctica based on gravity, magnetic and radar data

the paper does not give an overview or a critical discussion of bedrock properties for whole of East Antarctica; instead it essentially presents a new self-organising map derived from multiple existing datasets and their derivatives that potentially (although unfortunately not really discussed in the current MS) may provide a basis for new interpretations of subglacial bed geology, compared to the relatively simple classification of the study region in sedimentary basins (Type I and 2), crystalline basement and mixed bed previously proposed by Aitken et al. (2023) in their continent scale Antarctic analysis.

### **Suggested revised title**

**Self-organizing map of the Wilkes and Aurora Subglacial Basin region in East Antarctica based on radar, aeromagnetic and aerogravity attributes**

### **Abstract-**

“Therefore, it is crucial to efficiently combine various attributes derived from satellite and airborne geophysical surveys to characterize subglacial properties”

**I find this claim difficult to follow-** what subglacial properties can we infer from satellites presently?-

I would argue not many!

We don't have high resolution views neither of bed topography nor of magnetic or gravity patterns from satellite data to image the heterogeneity of bed properties - but we do have a good large-scale view of the crust and lithosphere especially from GOCE (e.g. Ebbing et al., 2018; Pappa et al., 2019a,b).

As this study does not deal with satellite data, I would suggest either dropping this sentence in the abstract -or state that while satellite data provides views of spatial and temporal changes in ice sheet dynamics, as well as glimpses into the deeper crust and lithosphere, airborne geophysical data are a key to resolve the heterogeneity in subglacial geology and its properties.

“we evaluate a Self-Organizing Map (SOM), an unsupervised machine learning technique. The concept of SOMs, an unsupervised machine learning approach”. **There is repetition here- please mention just once**

“for the case at hand” **This could make a potential reader wonder other than a methodological application what the broader purpose of the study itself is.**

**Instead, I would strongly recommend highlighting earlier on in the abstract (right at the beginning) the key importance and impact of the study area-** aka the Wilkes and Aurora Subglacial basins are huge marine-based sectors of the EAIS that could potentially be prone to dynamic instability in the future. Hence understanding the influence of the heterogeneity in subglacial geology and bed topography is particularly important here.

Then I would say that the interpretation of these critical regions has so far relied on expert interpretations of airborne geophysical data but here you explore the application of a less subjective self-organising map as a tool to xxx etc.

“where also suitable data sets for the application of the SOM exist”

I would drop this sentence- we actually have many other areas in both East and West Antarctica where we have considerably better datasets than the ICECAP data used herein, which is mostly composed of very widely spaced radial lines (which is certainly NOT ideal for resolving the fine scale heterogeneity in subglacial geology and bed properties from aeromagnetic data for example- although it does give a large scale perspective of these huge marine based sectors of the EAIS that could not be achieved without a huge logistical effort if the surveys had been flown on conventional regularly spaced surveys such as those flown over the northern Wilkes Subglacial Basin (see also Ferraccioli et al., 2007, Terra Antarctica Reports);

Incidentally it is NOT just NASA data. The data you are using are from a major joint multinational US-UK-Australian and French and Italian effort ICECAP that was also BUT not exclusively supported by NASA! The data may have been downloaded from there but full recognition to ICECAP should also be given in the text.

“Previous analysis indicated the presence of both crystalline basement and sedimentary basins in the area, and our SOM shows a remarkable agreement”

**I would recommend rewording this-** highlight first what your approach brings to the table compared to the current state of the art- e.g. it unveils additional heterogeneity in the characterisation of cryptic properties of the subglacial highlands compared to continental-scale maps and then state that it aids depicting the distribution of sedimentary basins and crystalline basement domains in general agreement with previous expert interpretations based on aerogeophysical datasets;

**incidentally what is new from this SOM map is actually pretty difficult to follow also because the lack of a sufficiently well-founded geological or geomorphological interpretation and discussion sections in the current MS.**

“These variations can potentially be exploited further in describing subglacial properties and the coupling between bed and overlying ice-sheets”-

**this raises the question of why this was not done here.**

I would drop this sentence in the abstract and perhaps leave this pointer pending for the discussion or conclusion.

**Unless the paper is re-written very extensively, I would suggest you focus here primarily on the new method and the map you deliver as a new tool mainly.**

## **Introduction**

Aitken et al. 2023, Bell et al. 2008, McCormack et al. 2022. I would suggest adding

Bingham et al., 2012, *Nature* & Jordan et al., 2023, *Science Advances* to the list here

“airborne magnetic or gravity datasets”. **I would prefer this to be reworded** into aeromagnetic and airborne gravity datasets.

Ferraccioli et al 2002, 2009

**I would recommend adding also** Ferraccioli et al., 2011, *Nature*;

**I would recommend adding also** Forsberg et al., 2018, doi: <https://doi.org/10.1144/SP461.17>

That presents data from another critical marine-based sector of the EAIS;

McLean et al. 2009, Aitken et al. 2014, Kim et al. 2022

- Kim's paper is more about a compilation of magnetic data using satellite data- I would drop here.

"the interpretation requires some form of constraint to overcome the inherent ambiguities"

- this is of course true wrt to aeromagnetic data interpretation -but I would argue this also holds true if one uses multiple methods and their derivatives too.

For example, basal roughness varies at different scales and is not only due to subglacial geology, although at large spatial scales there will obviously tend to be a rougher bed over a crystalline-basement dominated Precambrian craton than a major sedimentary basin.

For the devil in the detail- see for example Jordan et al., 2010 Terra Nova. They show a nice example of an area with apparently quite uniform subglacial geology (at least according to potential field data interpretations) but remarkable differences in basal roughness (speculatively linked to a huge paleo-subglacial lake and associated drainage system);

Aeromagnetic and airborne gravity data may not resolve thin sedimentary drapes in marine basins (that is basins where marine incursion occurred in response to major ice sheet retreat atop of the pre-existing major sedimentary basins) at all;

Conversely, these data are more likely to image thick sedimentary basins that generally predate the EAIS by hundreds of millions of years- e.g. the Devonian to Jurassic Beacon Supergroup in the Wilkes Subglacial Basin region (see Ferraccioli et al., 2009a).

Where we have exposures of the rocks we can directly see that the mesa topography associated with Beacon Supergroup rocks massively intruded by Jurassic Ferrar sills tends to divert ice flow around it. Hence the patterns in the roughness of the bed are significantly more complex than a simple "smooth bed" atop of a sedimentary basin.

Overall, when one combines different methods it is important to address also how the individual limitations then combine together, also as a function of the features that one is then aiming to interpret in the first place (e.g. sedimentary basins, crystalline rocks-dominated mountain ranges etc). And of course, one has to be careful- there are huge mountain ranges dominated by sediments too that could have been incised by rivers and early glacial systems creating rough topography in highlands- see for example Rose et al., 2013 EPSL. A clear example of this are the Vostok Subglacial Highlands.

"data sets" change to datasets

"it is in part subject to interpretations"- well I would say that it is an interpretation!

It should be clearer in the text that Alan's map is an inferred subglacial geology map showing the proposed distribution of sedimentary basins (Type 1 and 2 as Alan called them... a terminology that notably I still find a bit cryptic as a geologist), mixed bed and crystalline rocks-dominated bedrock

"Please see Aitken et al. (2023) for more details on this".

I would not recommend using this type of sentence. Your paper needs to stand alone- and hence the main concepts and findings should be reviewed here- also because it is important to state more clearly what your own research objective is in the Wilkes and Aurora Subglacial Basin region. **Are you going to try and test and augment some of these previous interpretations with the aid a new tool?**

"Machine learning and statistical based methods are nowadays popular approaches for less heterogenous models". **This sentence is rather unclear to me.** What are you trying to say exactly here? That we don't use machine learning for inferring subglacial geology or something else?

**Self-Organizing Maps-** a bit more references here than a single reference from 1990! would have been helpful. Please provide more updated references.

“The study area is in Wilkes Land, East Antarctica (Figure 1), chosen for the excellent coverage with line data”

**Firstly**, this is NOT only Wilkes Land. The area you covering includes Victoria Land, George V Land and Wilkes Land

**Secondly**, there is NOT excellent aeromagnetic or aeromagnetic data coverage here.

**Instead, there are widely spaced reconnaissance ICECAP lines in the study region compared say to the many GITARA aeromagnetic surveys over Vitoria Land (see e.g. Ferraccioli & Bozzo, 2003-<https://doi.org/10.1144/GSL.SP.2003.210.01.07> or Ferraccioli et al., 2009b-<https://doi.org/10.1016/j.tecto.2008.11.028>) or even compared to the WISE-ISODYN survey over the northern Wilkes Subglacial Basin (Ferraccioli et al., 2009; Jordan et al., 2013; <https://doi.org/10.1016/j.tecto.2012.06.041>), despite the key importance of this study region to comprehend the potential influence of heterogeneous bed topography properties on the behaviour of the marine based and hence potentially more vulnerable Wilkes and Aurora subglacial basin sectors of the EAIS.**

What is important to state (and needs to be added in the text) is that despite the large coverage in terms of area the line spacing of ICECAP surveys is wide especially in the interior of the EAIS (where by the way the onset of ice streaming occurs);

but your **SOM approach that exploits the full potential of line data still adds new views of the region when compared to interpretation methods based on grids alone**

Interested reader- I think a little bit more background would have helped here;

### 3.1 Study area

**I find this is a rather incomplete description of the study area.**

**The various bedrock features, basins, and geological domains should come across much more clearly here, especially if one then wants to highlight later on that the SOM approach provides hints into further complexities than previously inferred.**

**And as noted above -the coverage is reconnaissance in character with very widely spaced lines especially in the interior of the EAIS due to the radial flight pattern of ICECAP**

“consequently its massive potential for sea-level rise” – You need some references here!

(Fretwell et al., 2013)- is clearly NOT a good reference for the hot debate on the stability of this part of the EAIS. Please do the relevant literature research and cite the relevant papers.

And one needs to be updated to also add BEDMAP 3 that incorporates all the new data in this region! (references Pritchard et al., 2025, <https://doi.org/10.1038/s41597-025-04672-y>; Fremant et al., 2023, <https://doi.org/10.5194/essd-15-2695-2023>) including in the figure.

### 3.2. Datasets

We use the NASA Operation Ice Bridge (OIB) dataset collected between 2009 and 2012- ICECAP needs citing too!

Magnetic anomaly (taken from ADMAP-2 (Golynsky et al. 2018)?

**I am bit puzzled here-** you must have used a subset of ADMAP 2 here as we have a lot more aeromagnetic data in the study region- I presume you only used the re-processed ICECAP radial profiles we then compiled in ADMAP 2.

I suggest you use a transparent backdrop for all the datasets with BEDMAP 3, ADMAP 2 and the AntGG compilation and show the ICECAP radial lines you are re-analysing atop of the backdrop.

Effectively, despite all these additional data that would clearly help contextualise the geological and bed interpretation processes along the profiles you are going back solely to the individual ICECAP profiles which I find makes the paper mostly methodological focussed

*Figure 2.* The reversed magnetic anomaly scale with blue tones over highs and browns over lows is rather unconventional. I find it puzzling when compared to the original ADMAP 2 data or the input data of Aitken et al., 2014. Please change this!

Also, I wonder why the authors are not using the Ebbing et al., 2021 product that also replaces the long-wavelength component of the magnetic field with SWARM satellite magnetic data. By the way ICECAP data did not match very well higher resolution and better levelled data on the TAM side.

For the gravity data- I find the inverted colour scale with gravity lows shown in red confusing. Please change this!

#### **Airborne gravity data; MacGregor et al. 2021 etc**

If you asked NASA and the ICECAP team they would likely have given you the data. Also one has to be careful here. We did not have as good bedrock topography data compared to BEDMAP 3 at the time that we made the AntGG compilation in 2014 and then published it in 2016 in the Scheinert et al., 2016 GRL paper so ideally one would have:

1. Accessed the complete Free-Air gravity data
2. Recomputed the Bouguer anomaly based on the updated BEDMAP 3 compilation

Anyhow, if this is not possible at this stage to do this extra work, at least some sentence on the availability of more updated bed topography and ice thickness datasets in particular for Bouguer anomaly calculation should be made

“Instead of using the bedrock topography, it can be useful to determine the isostatic adjusted topography tiso”.

**I disagree it is not instead- BOTH the original bed and a rebounded version of the bed should be used and discussed.**

That said the bed is NOT going to rebound in an Airy way when the EAIS is removed (that is essentially prior to its formation -as the EAIS is unlikely to have ever completely collapsed since its formation) or retreated –

because these are typically more complex visco-plastic process than predicted by an Airy model. Some explanation on the simplifications associated with the Airy model should be introduced. And one should explain for the non-expert reader that the Bouguer anomaly map is strongly influenced by crustal thickness variations and hence the use of Airy isostatic maps can help enhance the shallow level intra-crustal sources of the anomalies.

In addition, if one wants to make more meaningful comparisons with **pre-glacial topography and geology then one should consider that huge amounts of glacial erosion and sediment unloading**

and flexure have occurred particularly in the region of these subglacial basins since EAIS initiation at the Eocene-Oligocene boundary –

so an interesting product to use would have been to also use the

Paxman et al 2019, 2020 **paleotopography datasets** (<https://doi.org/10.1016/j.palaeo.2019.109346>; <https://doi.org/10.1029/2020GL090003>) as this provides a more realistic view of the pre-glacial landscape and its links with pre-glacial geological boundary conditions

### Attributes

When you refer to the attributes please refer to the table upfront.

I would much have preferred to see some more profile views (e.g. at least a couple per basin and flanking mountain ranges) of the major features with multiple individual attributes displayed first and tied much better to a map view with a clearer overlay of the major subglacial basins and highlands and geological domains that one is investigating.

This is essential for any interpretation and discussion of the features.

Could be in the interpretation section but should be somewhere.

*Figure 3 Example of attributes used for the SOM.* The logic of this example is unclear to me. Why these rather than many others?

**B Spectral Power-** is this not influenced by distance to source?- the pink colours seem to correspond to outcropping Precambrian crystalline basement rocks

**3C** I find again the inverted colour scale un-conventional and the meaning of the shape index is also unclear to me

I believe it would have been better to present maps for related quantities first, aka bed, magnetic and gravity followed by mixed attributes for potential correlations (or lack thereof).

**Some explanation of why the spectral centroid bed is used would be useful- what can this yield?**

$\xi$  is the integrated power spectral density of the bed elevation profile in a 500 m to 2000 m wavelength bin. in a 500 m to 2000 m wavelength bin.

**Why was this wavelength used? Is there a wavelength dependency and what can different wavelengths be representative of?**

We use a bin covering 700 m to 800 m lag distance. **Why and what impact does this choice have?**

we used a 10 km-moving average filtered bed elevation. **Why was 10 km chosen?**

The TDX signal is the tilt derivative of the magnetic field. **Ok but what effect does the tilt derivative have on the aeromagnetic data-** and what was the purpose of this enhancement?

I assume the aim was enhancing the contribution of shallower magnetic anomaly sources as a way of helping in defining the heterogeneity in the bedrock geology? Needs explaining for the non-expert reader.

*Moving average filtered magnetic anomaly (Mean mag)*

Enhancing the short wavelength content- explain why this is useful

#### *Analytical signal (AS mag)*

When using higher order derivatives a careful analysis of the noise should be provided. Even where much higher quality aeromagnetic data on regular grids are available e.g over northern Victoria Land (e.g. Ferraccioli et al., 2009b) we generally had to filter the data with Hanning or other filters so as not to have too much noise in AS products.

#### *Isostatic anomaly (Iso grv)*

I would have preferred the use of BEDMAP 3 that is based on line data as opposed to a product that includes ice sheet mass conservation such as BedMachine. Additionally, the density contrast used seems very high for East Antarctica 530 kg/m<sup>3</sup>.

#### *Analytical signal (AS grv)*

Again- with the higher order derivatives it is important to check that the noise levels are not rendering noise in the grid only. Also, it is important to note that the definition of out of plane bedrock topography and ice thickness outside the widely spaced survey lines is poor and hence in the Bouguer anomaly data itself there can already be quite a lot of noise that can tend to blow up with the high order derivatives. Some smoothing/filtering is recommended

### **3.4 SOM calculation, used algorithms and other considerations**

Please provide a simpler and less vague (..other considerations) heading

e.g. SOM calculations is fine where limitations etc can be addressed in the text perhaps as a sub paragraph. The resulting SOM has a shape of 30 by 30- what?

## **4 Results and discussion**

I would have preferred to have seen a more critical and focussed discussion presented and preceded by an interpretation

“Such a varying topography will cause a varying gravity and to a minor portion magnetic signal”.

### **I am not sure I understand this statement.**

High frequency magnetic anomalies will correlate with rough crystalline basement topography. I don't understand why this would be considered surprising. Say you go over northern Victoria Land where you see the rough bed associated with relatively well exposed granitoids and metamorphic rocks and you clearly appreciate in tilt derivative maps the high frequency anomalies that are caused by these rocks. There are of course some exceptions where the rock assemblages are magnetite-poor but at large-scale this holds.

“That corresponds to the different sensitivity of the gravity and magnetic field to the sources, but might also indicate that we miss some of the gravity signal by using a gridded data set as input and not measurements along the flight lines”

That is not likely to be the only reason. It is important to note that airborne gravity data are heavily filtered typically with a ca 9 km half width filters (see e.g. Jordan et al., 2013-  
<https://doi.org/10.1016/j.tecto.2012.06.041>)

### **4.2 Weights for individual attributes**

Before we analyse the SOM in more details with respect to its possible (geological meaning) please take the parenthesis out of the sentence does not make sense

*Figure 5 Weights for every attribute and cell of the SOM. All attributes were rescaled using the standard deviation, before the training started.*

I am not sure I understand this figure.

What are we seeing the whole study area domain or something else?

#### **Figure 6 Visualization of the SOM and class distribution**

I find this figure quite difficult to follow.

Before having everything displayed together it may perhaps have been clearer to see each category of features proposed by Aitken et al., 2023 displayed individually (and ideally also with selected examples extracted in the correct geographic location) vs the SOM.

Aka to what extent can one define for different areas Type 1 basins, Type 2 basins, mixed beds etc using a SOM approach? (also considering large differences between the widely spaced interior regions and the coastal sectors where coverage is much better).

I am also struggling a lot to have a spatial view. I assume that although we are seeing a map this is not locating the corresponding features in map view.

I also don't understand the letters and the dashed lines that well. For example, when I look at region E there seems to be a remarkable contrast between the red and blue regions with little similarity between them -so I fail to understand while this all labelled as a single feature E.

*Figure 7: Representation of the clusters from the SOM. A) Geographical distribution of the SOM., B) Unified distance matrix for the presented SOM. C) Classification of geological bed type from Aitken et al. (2023). Yellow line indicates profile of Figure 8.*

**This figure is difficult to follow. Firstly, the colour scale is very difficult to follow as the differences between the colours between A and C and D and E is hard to appreciate. I am not sure the text has explained clearly enough what the unified distance matrix shown in panel b is and panel c has no km scale or coordinate label. It is critical that you show the previous interpretation of Aitken et al., 2023 with labels of the geographic features you then refer to in the text at the SAME scale as the colour map of the SOM. Furthermore, I would suggest that you show an additional panel with these overlain so one can start thinking about the potential interpretation of additional heterogeneities not addressed in the continental scale interpretation of Aitken et al. Also where is the yellow line showing the location of Figure 8?**

**Figure 8 should also report locations. What basin and highlands are we looking at?**

I would have preferred at least a couple of profiles per major subglacial basin and a more detailed discussion of results -not just the methodological part.
